# Supplementary material for: Holocene shifts in marine mammal distributions around Northern Greenland revealed by sedimentary ancient DNA
Source: Research Square preprint supplement (doi:10.21203/rs.3.rs-5291490/v1), 2024-11-04
Supplement: Supplementary file 1 [file f5c1f06fe94261c6d1a275d6.xlsx]

## Sheet: Data table 1
Data table 1 Shotgun sequencing data. For DNA assigned to eukaryotes (green columns), all unique sequences on a taxonomic family level are shown per sample and for DNA assigned to prokaryotes (red columns), all unique seuqences on a taxonomic phylum level are shown. All samples which did not pass the filtering criteria (minimum of 10 unique sequences and taxonomic assignment on a family/phylum le…
						Eukaryota										Prokaryota
Library ID	Core	Depth in core (cm)	Estimated minimum age (cal a BP)	Estimated maximum age (cal a BP)	Estimated median age (cal a BP)	Bacillariaceae	Balaenopteridae	Chaetocerotaceae	Gadidae	Liparidae	Phocidae	Priapulidae	Hominidae	Pinaceae	Poaceae	Acidobacteriota	Actinomycetota	Atribacterota	Bacillota	Bacteroidota	Campylobacterota	Candidatus Aerophobetes	Candidatus Aminicenantes	Candidatus Bathyarchaeota	Candidatus Binatota	Candidatus Coatesbacteria	Candidatus Latescibacterota	Candidatus Neomarinimicrobiota	Candidatus Omnitrophota	Candidatus Thermoplasmatota	Candidatus Zixiibacteriota	Chloroflexota	Euryarchaeota	Gemmatimonadota	Ignavibacteriota	Myxococcota	Nitrososphaerota	Nitrospirota	Planctomycetota	Pseudomonadota	Spirochaetota	Streptophyta	Thermodesulfobacteriota	Uroviricota	Verrucomicrobiota
eDNALib006_050	DA17_st7_73G	0.5	363	218	286.3	0	0	0	0	0	17	20	0	0	0	24	161	0	0	71	0	0	0	0	0	0	0	0	0	0	0	0	0	40	0	38	2160	520	332	4750	0	0	0	0	0
eDNALib006_085	DA17_st7_73G	9.5	594	423	505.3	0	0	0	0	0	0	56	0	0	0	0	100	0	0	108	0	0	0	0	0	0	0	0	0	0	0	0	0	12	12	751	0	0	711	5226	0	0	51	0	0
eDNALib006_067	DA17_st7_73G	42	1429	1166	1296.1	0	0	0	0	0	13	0	0	0	0	0	111	0	0	271	240	11	102	33	0	0	0	115	0	29	21	63	17	12	0	1208	143	20	1061	1554	0	0	684	0	0
eDNALib006_055	DA17_st7_73G	92	2701	2336	2518.3	0	0	0	60	0	0	0	0	0	0	0	56	0	0	0	0	0	23	0	0	0	0	172	0	12	0	15	0	0	0	513	32	23	596	762	0	0	187	0	0
eDNALib006_049	DA17_st7_73G	117	3326	2946	3135.4	0	0	0	80	0	0	0	0	0	0	27	111	0	0	1048	0	39	140	23	0	0	0	52	0	28	13	164	19	12	0	1485	178	33	893	1279	0	0	262	0	0
eDNALib006_084	DA17_st7_73G	126	3550	3172	3360	0	0	0	69	0	16	0	0	0	0	14	78	0	0	46	0	25	187	14	0	0	0	68	0	22	0	32	0	10	0	1400	45	22	657	571	43	0	126	0	0
eDNALib006_078	DA17_st7_73G	136	3798	3422	3609.4	0	0	0	116	0	39	0	0	0	0	10	86	0	0	503	34	65	103	15	0	11	0	79	0	25	13	58	0	0	0	906	184	25	709	976	0	0	147	0	0
eDNALib006_072	DA17_st7_73G	143	3971	3598	3784.1	0	0	0	66	0	20	0	0	0	0	0	0	0	0	0	0	72	401	23	0	0	0	65	0	26	15	53	12	0	0	1498	140	21	511	690	0	0	118	0	0
eDNALib006_066	DA17_st7_73G	163	4468	4099	4283	0	0	0	109	11	15	0	0	0	0	10	57	0	0	0	0	106	164	16	0	0	0	23	0	18	12	93	20	0	0	2660	25	0	481	380	0	0	159	0	0
eDNALib006_060	DA17_st7_73G	203	5460	5102	5280.9	0	0	0	58	0	28	0	0	0	0	15	106	0	0	37	0	96	128	26	0	0	0	209	0	22	13	41	0	0	0	1542	146	14	506	741	13	0	130	0	0
eDNALib006_048	DA17_st7_73G	219	5857	5503	5680	0	0	0	75	0	0	0	0	0	0	0	74	0	0	54	30	83	76	0	0	0	0	115	0	34	0	48	29	10	0	1318	0	17	348	697	0	0	72	0	0
eDNALib006_054	DA17_st7_73G	234	6231	5873	6051.8	0	0	0	213	0	28	0	0	0	0	0	110	0	0	0	0	13	32	11	0	0	0	36	0	0	0	0	30	0	0	977	138	0	497	446	15	0	27	0	0
eDNALib006_083	DA17_st7_73G	254	6749	6379	6562.4	0	0	0	169	0	0	0	0	0	0	0	167	0	0	12	28	93	84	29	0	0	0	136	17	21	0	34	25	0	0	1664	264	19	626	910	11	0	135	0	0
eDNALib006_077	DA17_st7_73G	267	7141	6765	6948.7	0	0	0	66	0	20	0	0	0	0	14	101	0	0	43	47	60	95	18	0	0	0	49	0	26	0	54	10	0	0	1367	59	10	562	1703	0	0	131	0	0
eDNALib006_071	DA17_st7_73G	284	7653	7271	7453.8	0	0	0	373	0	92	0	0	0	0	0	91	0	0	51	0	22	57	14	0	0	0	33	0	26	0	107	0	0	0	974	172	22	563	685	12	0	56	0	0
eDNALib006_065	DA17_st7_73G	299	8106	7716	7899.5	0	0	0	497	11	139	0	0	0	0	0	139	0	0	85	0	211	64	0	0	0	0	43	0	25	0	43	16	0	0	1338	212	27	165	859	13	0	82	0	0
eDNALib006_059	DA17_st7_73G	314	8586	8170	8374.1	0	0	0	22	0	0	0	0	0	0	0	0	0	207	0	435	101	38	0	0	0	0	10	0	13	0	0	0	0	0	447	38	0	33	1035	0	0	21	0	0
eDNALib006_053	DA17_st7_73G	325	8941	8504	8724.4	0	0	0	114	0	36	0	0	0	0	0	113	0	0	244	0	75	111	17	0	0	0	81	0	22	0	45	13	0	0	879	559	36	502	985	0	0	40	0	0
eDNALib006_047	DA17_st7_73G	340	9425	8958	9202.1	0	0	0	380	0	59	0	0	0	0	0	77	0	75	64	0	103	17	0	0	0	0	0	0	0	0	10	0	0	0	786	216	36	310	891	0	0	101	0	0
eDNALib006_012	LK21_ICst26	1.5	-40	631	222	0	0	0	61	0	0	0	0	0	0	26	445	0	0	434	0	0	0	0	0	0	0	0	0	0	0	10	40	17	0	100	539	213	540	4560	0	0	15	0	0
eDNALib006_006	LK21_ICst26	5	31	2269	904	0	0	0	14	0	0	0	0	0	0	36	464	0	0	584	0	0	0	0	0	0	0	0	0	13	0	17	0	21	16	329	295	27	1194	6555	0	0	51	0	0
eDNALib006_041	LK21_ICst26	10	1059	2815	2231	0	0	0	44	0	19	0	0	0	0	32	52	0	0	216	0	10	68	10	0	0	0	17	27	12	0	0	0	50	26	601	0	0	466	1091	0	0	160	0	0
eDNALib006_040	LK21_ICst26	30	2936	3895	3411	0	0	0	41	0	0	0	0	0	0	40	137	14	0	0	0	151	205	34	0	0	0	51	21	0	0	117	42	20	0	717	104	20	372	395	0	0	125	0	0
eDNALib006_005	LK21_ICst26	45	3572	4369	3992	0	0	0	292	0	32	0	0	0	0	33	131	0	0	0	0	43	126	30	0	0	0	49	19	18	11	93	28	21	0	851	36	13	560	432	0	0	122	0	0
eDNALib006_011	LK21_ICst26	60	4242	5235	4704	0	0	0	150	0	20	0	0	0	0	27	186	0	0	0	0	20	99	42	0	0	0	54	0	20	11	143	21	13	0	1655	0	12	422	497	0	0	132	0	0
eDNALib006_017	LK21_ICst26	75	4995	6099	5497	0	0	0	223	0	17	0	0	0	0	21	149	0	0	739	62	19	81	28	0	0	0	50	0	17	10	129	0	12	0	1007	108	67	456	1394	0	0	102	0	0
eDNALib006_023	LK21_ICst26	90	5602	7019	6268	0	0	0	649	0	46	0	0	0	0	51	190	0	0	342	0	22	139	43	0	0	0	26	0	28	123	177	24	17	0	1352	34	19	507	1313	0	0	128	0	0
eDNALib006_029	LK21_ICst26	100	6086	7511	6792	0	0	44	918	0	90	0	0	0	0	31	160	0	0	0	0	11	72	28	0	0	0	33	0	24	17	686	23	13	0	844	30	0	427	975	0	0	122	0	0
eDNALib006_035	LK21_ICst26	110	6656	7955	7309	0	29	0	3348	0	263	16	98	0	0	77	716	0	0	330	0	36	212	106	0	0	0	62	14	56	83	4478	31	24	0	6384	585	27	1172	1829	0	0	278	0	0
eDNALib006_039	LK21_ICst26	120	7105	8569	7814	0	0	0	1649	0	82	0	0	0	0	25	178	11	0	43	0	74	263	18	0	0	0	35	0	19	97	139	42	11	0	1881	46	0	318	538	0	0	98	0	0
eDNALib006_004	LK21_ICst26	135	7854	9339	8582	0	0	10	915	0	104	2223	0	10	0	46	272	0	554	95	9005	13	46	27	0	0	0	341	13	20	0	633	0	23	0	1106	116	0	469	92893	0	10	193	0	0
eDNALib006_010	LK21_ICst26	150	8556	10071	9280	60	13	18	430	16	64	60	0	0	0	38	251	0	0	292	0	19	73	77	0	0	0	166	16	77	20	113	0	16	0	1252	169	11	649	999	0	0	131	0	0
eDNALib006_016	LK21_ICst26	165	9236	10765	9940	0	0	0	171	0	0	0	0	0	0	0	0	0	0	0	0	0	0	0	0	0	0	21	0	0	0	11	0	0	0	230	0	0	25	0	0	0	20	0	0
eDNALib006_022	LK21_ICst26	180	9816	11764	10666	81	0	74	1998	13	179	13	0	0	0	69	451	13	0	527	0	27	111	40	0	0	0	35	19	33	13	942	98	0	0	2602	655	37	540	2090	0	0	141	0	0
eDNALib006_028	LK21_ICst26	195	10369	12772	11415	0	0	0	1547	37	441	0	0	0	0	0	0	0	57	5078	0	13	24	0	0	0	0	19	0	51	0	105	24	0	0	392	367	42	192	3224	0	0	45	0	0
eDNALib006_034	LK21_ICst26	210	10956	13752	12178	0	0	37	1095	0	99	0	0	0	0	0	116	0	0	246	0	0	53	13	0	0	0	44	14	0	0	55	19	0	0	23	1431	28	282	2581	0	0	15	52	0
eDNALib006_009	LK21_ICst26	235	NA	NA	NA	0	0	0	92	0	0	0	0	0	0	0	143	0	0	97	0	0	0	0	0	0	0	0	0	0	0	214	42	13	0	13	871	0	144	2381	0	0	0	66	0
eDNALib006_015	LK21_ICst26	250	NA	NA	NA	0	0	0	122	0	0	0	0	21	0	0	328	0	0	344	0	0	0	0	0	0	0	0	0	0	0	25	63	10	0	22	1292	0	196	3368	0	21	0	250	0
eDNALib006_021	LK21_ICst26	265	NA	NA	NA	0	0	0	202	0	0	12	0	0	0	0	90	0	0	83	0	0	88	10	0	0	0	0	0	18	17	143	32	0	0	21	193	0	291	2140	0	0	34	151	0
eDNALib006_027	LK21_ICst26	280	NA	NA	NA	0	0	0	84	0	0	0	0	0	329	0	121	0	0	203	0	0	0	0	0	0	0	0	0	0	0	170	0	0	0	178	172	0	34	1713	0	329	19	150	0
eDNALib006_033	LK21_ICst26	295	NA	NA	NA	0	0	0	38	0	0	0	0	0	0	0	612	0	0	54	0	0	45	0	0	0	0	0	0	60	0	436	0	22	0	44	47	0	50	1391	0	0	34	285	0
eDNALib006_025	Ryder19_12_GC	0.5	1757	1879	134	0	0	0	55	0	0	0	0	0	0	12	630	0	0	63	0	0	0	0	0	0	0	0	0	0	0	28	0	13	0	14	299	60	171	8535	0	0	0	0	0
eDNALib006_019	Ryder19_12_GC	15.5	4842	5040	4934	0	0	0	157	0	17	0	0	0	0	61	608	0	0	0	0	0	0	0	0	0	0	0	0	0	0	49	0	48	0	23	428	67	207	6131	0	0	0	0	0
eDNALib006_013	Ryder19_12_GC	25.5	6418	6589	6510	0	0	12	147	0	35	0	0	0	0	11	381	0	0	0	0	0	0	0	0	0	0	0	0	0	0	34	0	17	0	13	396	26	317	4050	0	0	0	0	0
eDNALib006_007	Ryder19_12_GC	35.5	7010	7218	7114	0	0	49	340	0	57	0	0	0	0	50	743	0	0	196	0	0	0	0	0	0	0	0	0	0	0	38	0	42	0	58	858	27	242	6958	0	0	0	0	0
eDNALib006_001	Ryder19_12_GC	50.5	7402	7587	7494	0	0	17	1964	0	42	19	0	0	0	12	273	0	0	244	0	0	0	0	0	0	0	0	0	0	0	27	0	47	0	24	846	18	315	5851	0	0	0	0	10
eDNALib006_026	Ryder19_24_PC	0.5	-12.5	-2	-8	0	0	34	67	0	14	0	0	0	0	12	684	0	0	0	0	0	0	0	0	0	0	0	0	0	0	30	0	46	0	16	250	48	319	10142	0	0	0	0	0
eDNALib006_020	Ryder19_24_PC	10.5	1212	1245	1227.5	0	0	18	123	0	0	0	0	0	0	64	605	0	0	197	0	0	0	0	0	0	0	0	0	0	0	27	0	54	0	17	620	31	294	5047	0	0	0	0	0
eDNALib006_014	Ryder19_24_PC	20.5	2434	2495.5	2463.5	0	0	18	567	0	31	0	0	0	0	44	797	0	0	226	0	0	0	0	10	0	12	0	0	0	0	52	0	56	0	19	1141	37	498	5104	0	0	0	0	48
eDNALib006_008	Ryder19_24_PC	30.5	3655	3746.5	3699	0	0	0	299	0	52	0	0	0	0	0	0	0	32	270	0	0	0	0	0	0	0	0	0	0	0	0	0	0	0	10	0	0	10	409	0	0	0	0	0
eDNALib006_002	Ryder19_24_PC	40.5	4876	4998.5	4935	0	0	0	1813	0	52	169	0	0	0	0	0	0	58	353	0	0	0	0	0	0	0	11	0	0	0	0	0	0	0	88	0	0	391	5798	0	0	28	0	314

## Sheet: Data table 2
Data table 2 Hybridization capture sequencing data. Detections are grouped into marine mammals (green columns), presumed bycatch (yellow columns) and presumed contamination (red columns). All samples which did not pass the filtering criteria (minimum of 3 unique sequences and taxonomic assignment on a species level) are not shown. For a detailed description of the bioinformatic processing of raw …
						Marine Mammals										Presumed bycatch				Presumed contamination
Library ID	Core	Depth in core (cm)	Estimated minimum age (cal a BP)	Estimated maximum age (cal a BP)	Estimated age (cal a BP)	Phoca groenlandica	Balaena mysticetus	Balaenoptera acutorostrata	Balaenoptera physalus	Cystophora cristata	Delphinapterus leucas	Erignathus barbatus	Monodon monoceros	Orcinus orca	Pusa hispida	Berkeleya fennica	Arctogadus glacialis	Boreogadus saida	Priapulus caudatus	Penicillium coprophilum	Homo sapiens	Sus scrofa	Ulota hutchinsiae	Pleurostomum flabellatum
cap_DA17_st7_73G_sect5_cm0_1	DA17_st7_73G	0.5	363	218	286.3	0	0	0	0	0	0	145	11	0	3	4	0	0	0	0	0	0	0	0
cap60_Lib006_085	DA17_st7_73G	9.5	594	423	505.3	0	0	0	0	0	0	0	0	0	3	0	0	0	0	0	0	0	0	0
SCR_139	DA17_st7_73G	37	1301	1052	1174.4	0	0	0	0	0	0	0	0	0	0	4	0	0	0	0	0	0	0	0
cap52_Lib006_067	DA17_st7_73G	42	1429	1166	1296.1	0	0	0	0	0	0	0	3	0	0	0	0	0	0	0	0	0	0	0
SCR_140	DA17_st7_73G	52	1686	1394	1539.4	0	0	0	0	0	0	0	0	0	3	0	0	0	0	0	0	0	0	0
cap50_Lib006_061	DA17_st7_73G	67	2071	1737	1904.4	0	0	0	0	0	0	0	4	0	0	4	0	0	0	0	0	0	0	0
SCR_143	DA17_st7_73G	82	2450	2095	2272.4	0	0	0	0	0	0	0	3	0	0	0	0	0	0	0	0	0	0	0
cap45_Lib006_055	DA17_st7_73G	92	2701	2336	2518.3	0	0	0	0	0	0	0	5	0	0	0	0	0	0	3	0	0	0	0
cap41_Lib006_049	DA17_st7_73G	117	3326	2946	3135.4	3	0	0	0	0	0	14	8	0	10	4	0	0	0	0	0	0	0	0
cap59_Lib006_084	DA17_st7_73G	126	3550	3172	3360	0	0	0	0	0	0	0	0	0	4	0	0	0	0	0	0	0	0	0
cap56_Lib006_078	DA17_st7_73G	136	3798	3422	3609.4	0	0	0	0	0	0	0	8	0	9	5	0	0	0	0	0	0	0	3
cap54_Lib006_072	DA17_st7_73G	143	3971	3598	3784.1	0	0	0	0	0	0	3	3	0	5	4	0	0	0	0	0	0	0	0
SCR_144	DA17_st7_73G	148	4096	3723	3908.8	42	0	0	0	0	0	0	4	0	10	0	0	0	0	0	0	0	0	0
cap51_Lib006_066	DA17_st7_73G	163	4468	4099	4283	0	0	0	0	0	0	0	5	0	3	0	0	0	0	0	0	0	0	0
cap49_Lib006_060	DA17_st7_73G	203	5460	5102	5280.9	0	0	0	0	0	0	10	0	0	3	0	0	0	0	0	0	0	0	0
cap11_Lib006_048	DA17_st7_73G	219	5857	5503	5680	0	3	0	0	0	0	0	0	0	0	0	0	0	0	0	0	0	0	0
cap44_Lib006_054	DA17_st7_73G	234	6231	5873	6051.8	0	0	0	0	0	0	0	0	0	3	0	0	0	0	0	0	0	0	0
cap58_Lib006_083	DA17_st7_73G	254	6749	6379	6562.4	0	0	0	0	0	0	0	0	0	0	4	0	0	0	0	0	0	0	3
cap14_Lib006_077	DA17_st7_73G	267	7141	6765	6948.7	10	0	0	0	0	0	0	0	0	0	0	0	0	0	0	0	0	0	0
cap_DA17_st7_73G_sect2_cm68_69	DA17_st7_73G	284	7653	7271	7453.8	42	0	0	0	0	0	0	0	0	6	0	0	0	0	0	0	0	0	0
cap_DA17_st7_73G_sect2_cm83_84	DA17_st7_73G	299	8106	7716	7899.5	44	0	0	0	0	0	0	4	0	20	0	0	3	0	3	0	0	0	0
cap46_Lib006_059	DA17_st7_73G	314	8586	8170	8374.1	0	0	0	0	0	0	0	0	0	0	0	0	0	0	0	0	0	0	4
cap43_Lib006_053	DA17_st7_73G	325	8941	8504	8724.4	0	0	0	0	0	0	3	0	0	0	0	0	0	0	0	0	0	0	0
cap_DA17_st7_73G_sect1_cm24_25	DA17_st7_73G	340	9425	8958	9202.1	4	0	0	0	0	0	0	0	0	0	0	0	0	0	5	0	0	0	0
cap03_Lib006_012	LK21_ICst26	1.5	-40	631	222	0	0	0	0	0	0	0	0	0	3	0	0	0	0	0	0	0	0	0
cap20_Lib006_006	LK21_ICst26	5	31	2269	904	3	0	0	0	0	0	0	4	0	0	0	0	0	0	0	0	0	0	0
cap39_Lib006_041	LK21_ICst26	10	1059	2815	2231	0	0	0	0	0	0	3	3	0	4	0	0	0	0	0	0	0	0	0
SCR_077	LK21_ICst26	12.5	1968	2905	2511	0	0	0	0	0	0	0	0	0	3	0	0	0	0	0	0	0	0	0
cap_LK21-ICst26_sec3_15cm	LK21_ICst26	30	2936	3895	3411	3	0	0	0	0	4	4	0	0	0	0	0	0	0	4	0	0	0	0
cap_LK21-ICst26_sec3_30cm	LK21_ICst26	45	3572	4369	3992	5	0	0	0	3	0	4	0	0	8	6	0	0	0	0	0	0	0	0
cap_LK21-ICst26_sec3_45cm	LK21_ICst26	60	4242	5235	4704	0	3	0	0	0	4	0	3	0	3	4	0	0	0	0	0	0	0	0
cap_LK21-ICst26_sec3_60cm	LK21_ICst26	75	4995	6099	5497	4	31	0	0	0	5	6	4	0	3	4	0	0	0	0	0	0	0	0
cap28_Lib006_023	LK21_ICst26	90	5602	7019	6268	3	0	0	0	0	0	0	0	0	0	0	0	0	0	0	0	0	0	0
cap07_Lib006_029	LK21_ICst26	100	6086	7511	6792	4	0	0	0	0	0	0	0	0	5	0	0	0	0	0	0	0	0	0
cap_LK21-ICst26_sec3_95cm	LK21_ICst26	110	6656	7955	7309	39	4	16	0	0	6	21	19	6	34	12	0	25	0	10	16	0	0	0
cap_LK21-ICst26_sec2_5cm	LK21_ICst26	120	7105	8569	7814	11	4	0	3	0	3	12	22	0	25	8	0	18	0	5	0	0	0	0
cap_LK21-ICst26_sec2_20cm	LK21_ICst26	135	7854	9339	8582	12	5	0	0	0	0	46	21	0	32	10	0	13	11	4	4	0	0	0
cap_LK21-ICst26_sec2_35cm	LK21_ICst26	150	8556	10071	9280	13	63	0	0	0	0	22	21	0	10	10	0	5	0	3	0	0	0	0
cap68_Lib006_016	LK21_ICst26	165	9236	10765	9940	4	0	0	0	0	0	9	5	0	0	4	0	4	0	0	0	0	0	0
cap_LK21-ICst26_sec2_65cm	LK21_ICst26	180	9816	11764	10666	20	10	0	0	0	0	17	52	0	45	21	0	25	0	15	0	0	0	0
cap_LK21-ICst26_sec2_80cm	LK21_ICst26	195	10369	12772	11415	670	0	0	0	4	0	0	13	0	57	8	16	35	0	8	0	0	0	0
cap_LK21-ICst26_sec2_95cm	LK21_ICst26	210	10956	13752	12178	0	0	0	0	0	0	0	0	0	13	6	0	0	0	3	0	0	0	0
cap34_Lib006_009	LK21_ICst26	235	NA	NA	NA	0	0	0	0	0	0	0	0	0	0	0	0	0	0	3	0	0	0	0
cap67_Lib006_015	LK21_ICst26	250	NA	NA	NA	0	0	0	0	0	0	0	0	0	0	0	0	0	0	0	0	0	3	0
cap_Ryder19_12_GC1_0_5cm	Ryder19_12_GC	0.5	96	170	134	0	0	0	0	0	0	0	3	0	13	3	0	0	0	0	0	0	0	0
SCR_134	Ryder19_12_GC	5.5	1757	1879	1815	0	0	0	0	3	0	0	10	0	6	0	0	0	0	0	0	0	0	0
SCR_132	Ryder19_12_GC	10.5	3418	3589	3496	0	0	0	0	0	0	0	5	0	5	0	0	0	0	0	0	0	0	0
cap_Ryder19_12_GC1_15_5cm	Ryder19_12_GC	15.5	4842	5040	4934	0	0	0	0	0	0	0	45	0	19	3	0	0	0	0	0	0	0	0
cap_Ryder19_12_GC1_25_5cm	Ryder19_12_GC	25.5	6418	6589	6510	0	0	0	0	0	0	0	20	0	6	4	0	0	0	0	0	0	0	0
SCR_126	Ryder19_12_GC	30.5	6743	6937	6843	0	0	0	0	0	0	0	21	0	13	0	0	0	0	0	0	0	0	0
cap_Ryder19_12_GC1_35_5cm	Ryder19_12_GC	35.5	7010	7218	7114	0	0	0	0	4	0	0	138	0	75	8	4	6	0	0	0	0	0	0
cap_Ryder19_12_GC1_50_5cm	Ryder19_12_GC	50.5	7402	7587	7494	0	0	0	0	0	0	0	62	0	22	0	4	13	0	0	0	0	0	0
SCR_120	Ryder19_12_GC	55.5	7532	7710	7621	0	0	0	0	5	0	0	30	0	26	5	0	0	0	0	0	0	0	0
SCR_118	Ryder19_12_GC	65.5	7793	7957	7875	0	0	0	0	0	0	0	20	0	15	3	0	0	0	0	0	0	0	0
SCR_115	Ryder19_12_GC	80.5	8296	8566	8443	0	0	0	0	0	0	0	0	0	3	0	0	0	0	0	0	0	0	0
cap139_SCR_186	Ryder19_24_PC	0.5	-12.5	-2	-8	0	0	0	0	0	0	0	6	0	8	9	0	0	0	0	0	0	0	3
cap26_Lib006_020	Ryder19_24_PC	10.5	1212	1245	1227.5	0	0	0	0	0	0	0	12	0	4	0	0	0	0	0	0	0	0	0
cap_Ryder19_24_PC1_sec1_20_5cm	Ryder19_24_PC	20.5	2434	2495.5	2463.5	0	0	0	0	0	10	0	41	0	22	0	4	0	0	0	0	0	0	0
cap66_Lib006_008	Ryder19_24_PC	30.5	3655	3746.5	3699	12	0	0	0	0	0	0	63	0	45	0	3	6	0	0	0	0	0	0
cap_Ryder19_24_PC1_sec1_40_5cm	Ryder19_24_PC	40.5	4876	4998.5	4935	20	0	0	0	10	0	0	111	0	24	5	3	16	0	0	0	0	0	0
cap139_SCR_184	Ryder19_24_PC	77	7207	7342	7272	0	0	0	0	0	0	0	0	0	3	0	0	0	0	0	0	0	0	0
SCR_125	blank	NA			NA	0	0	0	0	0	0	0	0	0	0	0	0	0	0	0	7	0	0	0
cap47_Lib006_056	blank	NA			NA	0	0	0	0	0	0	0	0	0	0	0	0	0	0	0	10	0	0	0
cap61_Lib006_045	blank	NA			NA	0	0	0	0	0	0	0	0	0	0	0	0	0	0	0	4	0	0	0
cap62_Lib006_046	blank	NA			NA	0	0	0	0	0	0	0	0	0	0	0	0	0	0	0	18	0	0	0
cap70_Lib006_091	blank	NA			NA	0	0	0	0	0	0	0	0	0	0	0	0	0	0	0	0	4	0	0

## Sheet: Data table 3
Data table 3 Selected foraminifera counts of marine sediment core Melville Bay 26G (LK21st.26GC). Only benthic foraminifera (calcareous and agglutinated) foraminifera associated with chilled Atlantic Water masses are shown.
Mean depth in core (cm)	Sediment (g)	Cassidulina neoteretis	Cassidulina reniforme	Islandiella norcrossi	Pullenia osloensis	Adercotryma glomerata	Lagenammina difflugiformis	Reophax catenata/catella	Reophax pilulifer	Reophax (sub)fusiformis	chilled atl. forams/gram
1.5	4.5					15	20		2	2	8.6
7.5	5		1	1			12				2.8
25	5.1		1			2					0.6
35	4.1	7	4	8	5		11		1		8.7
45	4.1		8	5	1	3	21			1	9.5
55	4.7		6	2		6	15		3		6.8
65	5	13	31	21	5	10	6		1	2	17.9
75	4.1	6	56	36							23.6
85	4.7	20	47	13	6						18.2
95	4.9	11	28	13		1			1		11
105	4.4	16	49	30					1		21.9
125	4.7	53	97	75							48.1
135	2.1	43	44	37		1	1				60.3
145	2.4	9	37	25				1			29.4
155	4.3	12	79	17			1				25.4
165	4.5	8	47	15							15.6
175	2.3	1	8	6							6.6
185	4.3		2		1						0.7
195	6.1										0
205	4.4				1						0.2
225	4.9										0
235	4.3										0
255	4.5										0
265	4.8										0
295	4.9										0

## Sheet: Data table 4
Data table 4 Details on the age-depth derivation of Hall Basin 24PC (Ryder19-24-PC1) using OD1507-18GC.
Sample	Lab ID	Type	Depth(cm)	Equivalent Depth in Ryder19-24-PC1 (m)	14C Age (yrs)	Error (yrs)	dR (yrs)	Error (yrs)	Calibrated age (cal yrs BP)	errror (yrs)
Seafloor/core top				0	-69	5
OD1507_18 GC_29-31 P	SANU-56609	N.pachyderma	30	0.57	6740	30	270	80	6970	115
OD1507_18 GC_29-31 B	SANU-56607	C. neoteretis	30	0.57	6990	30	510	90	6980	125
OD1507_18 GC_68-71	SANU-56610	C. neoteretis	69.5	1.19	7950	40	510	90	7900	105
OD1507_18 GC_111-114	SANU-56611	C. neoteretis	112.5	1.61	8510	40	510	90	8470	100
OD1507_18 GC_270-272	SANU-56612	C. neoteretis	271	2.78	8910	40	510	90	8990	150
Base of' structurless diamict'				5.25					9600	200
